# Supplementary material for: The Impact of Volatile Anesthetic Choice on Postoperative Outcomes of Cardiac Surgery: A Meta-Analysis
Source: Hindawi journal article supplement (doi:10.1155/2017/7073401), 2017-01-01

SUPPLEMENTAL FILE

Funnel plot of figure 2

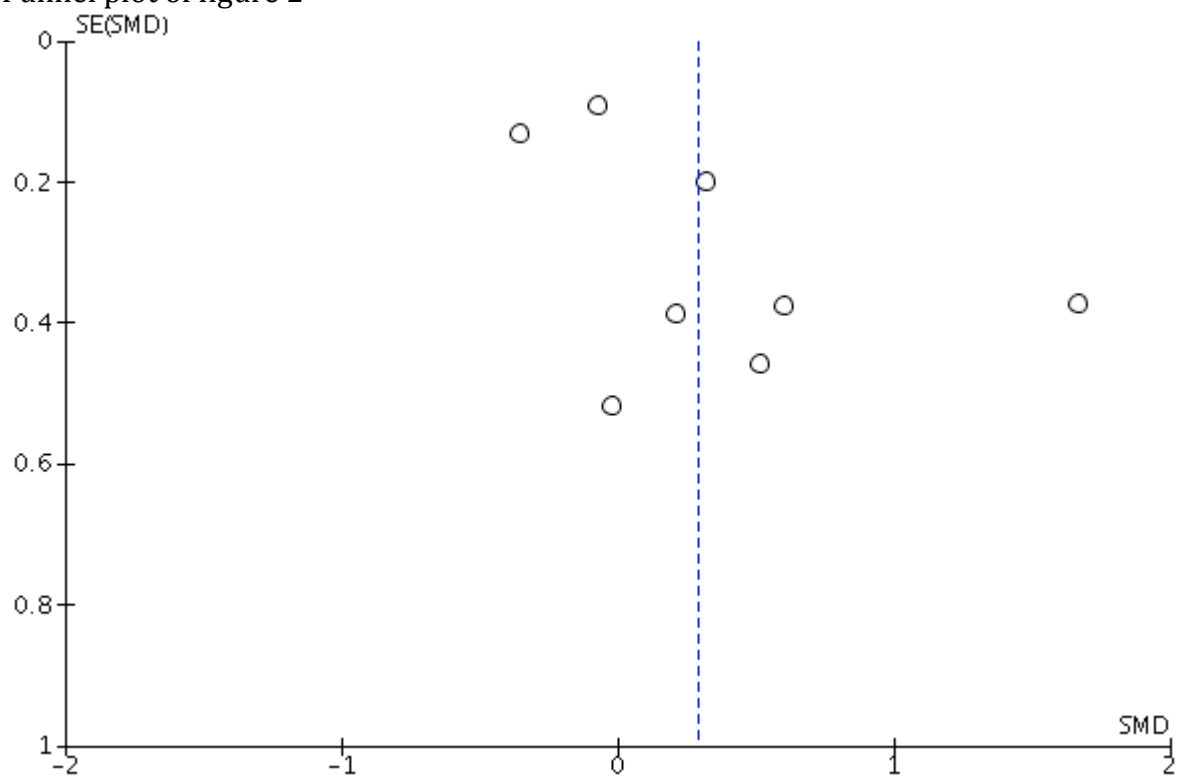

Funnel plot of figure 3

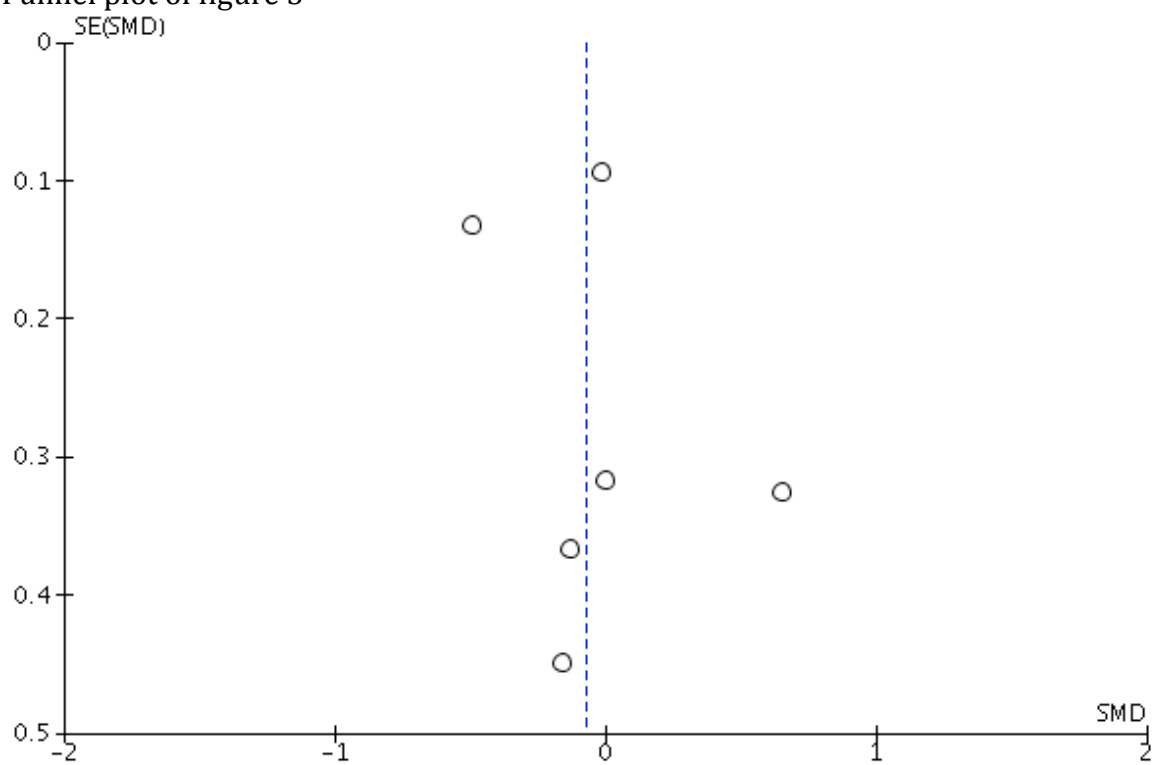

Funnel plot of figure 4

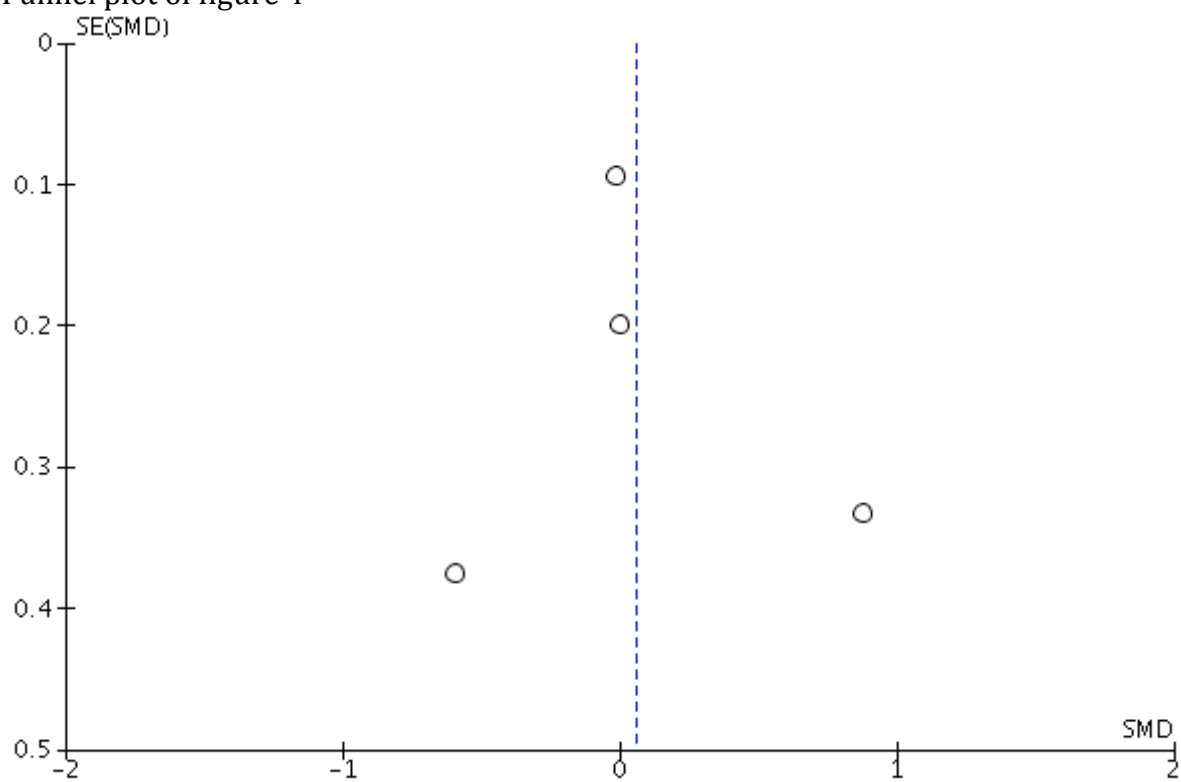

Funnel plot of figure 5

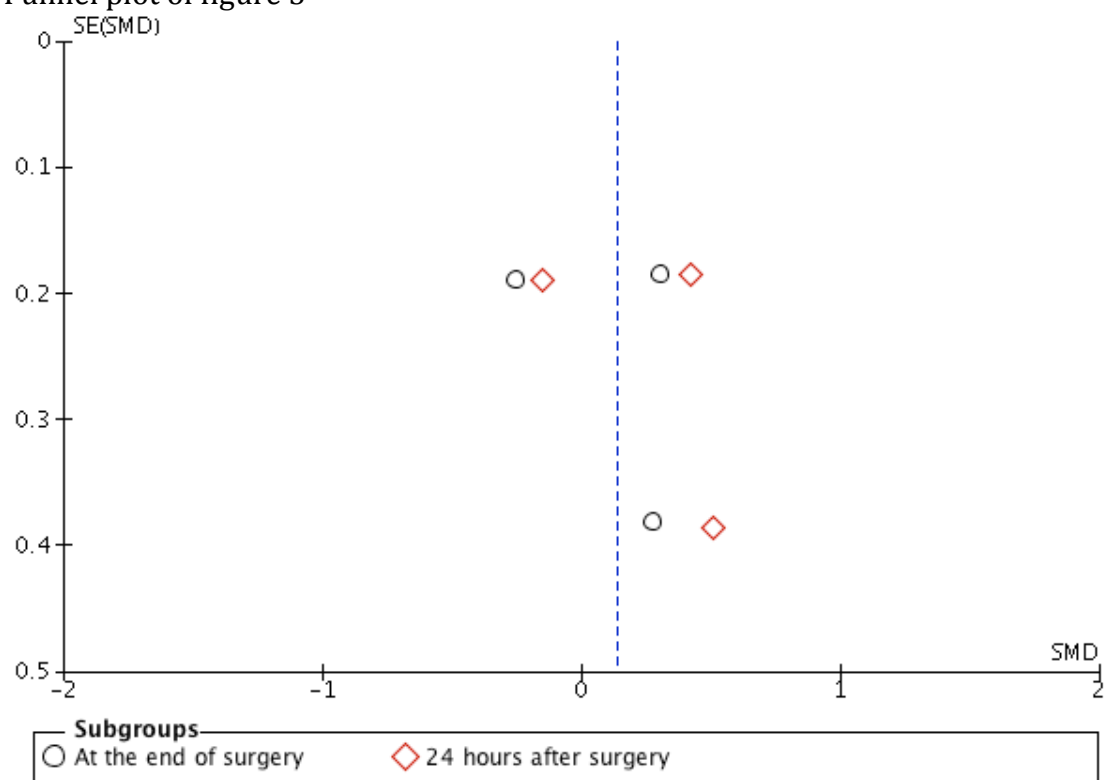

Funnel plot of figure 6

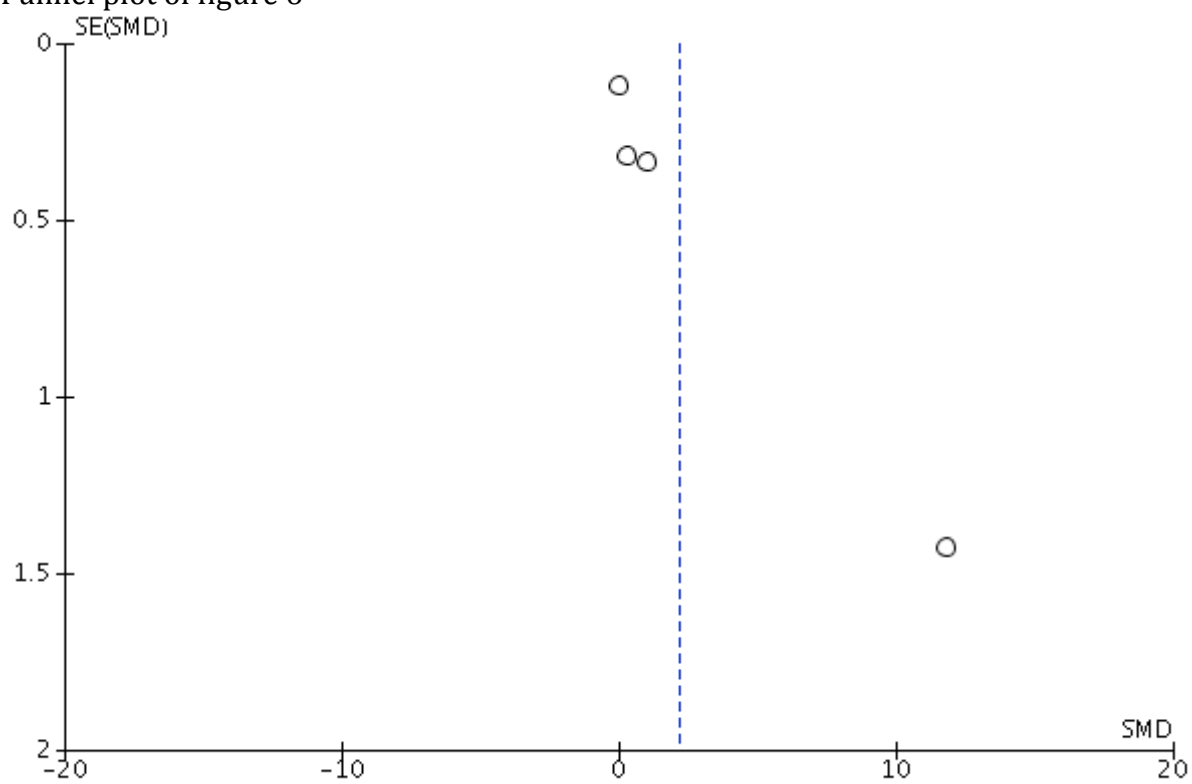

Funnel plot of figure 7

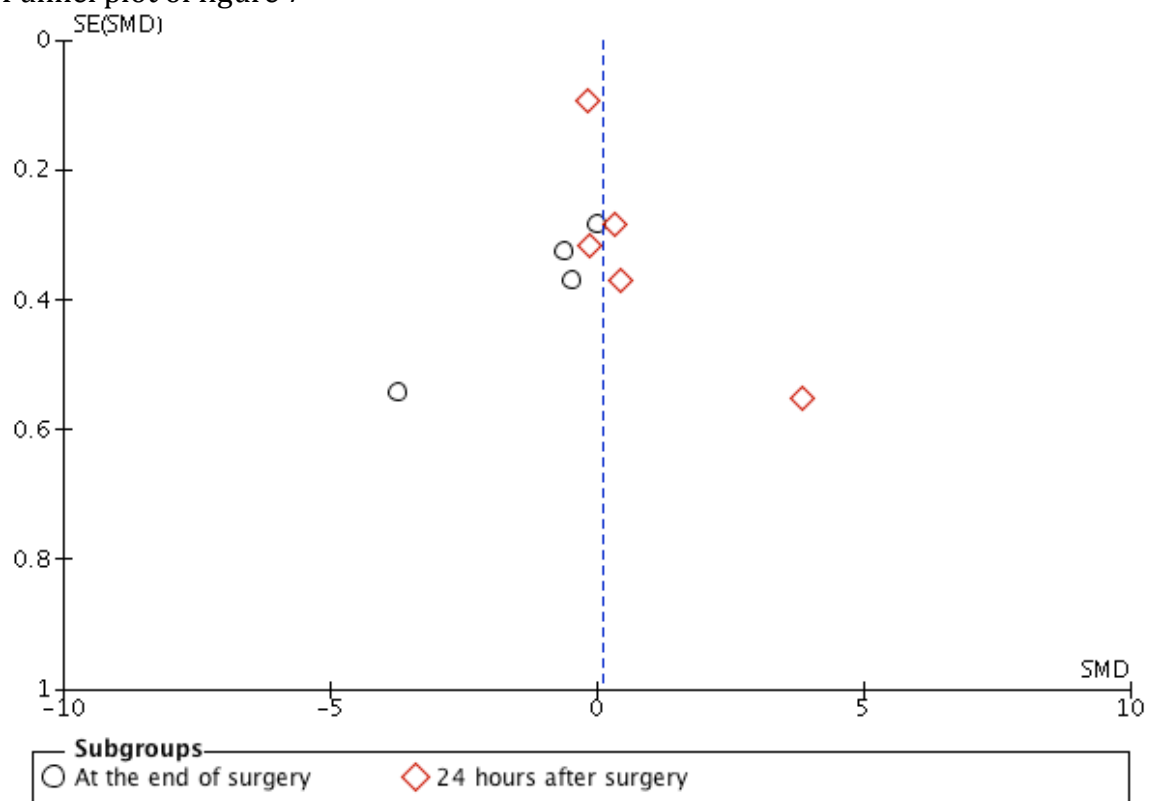

Supplement: f1 [file 7073401.f1.pdf]
